# Supplementary material for: Dormancy-associated MADS-box genes and microRNAs jointly control dormancy transition in pear (Pyrus pyrifolia white pear group) flower bud
Source: PubMed Central journal article supplement (PMC4682432; doi:10.1093/jxb/erv454), 2015-10-14
Supplement: supp_erv454_Supplementary_Figures_S1_to_S6.pdf [file supp_erv454_Supplementary_Figures_S1_to_S6.pdf]

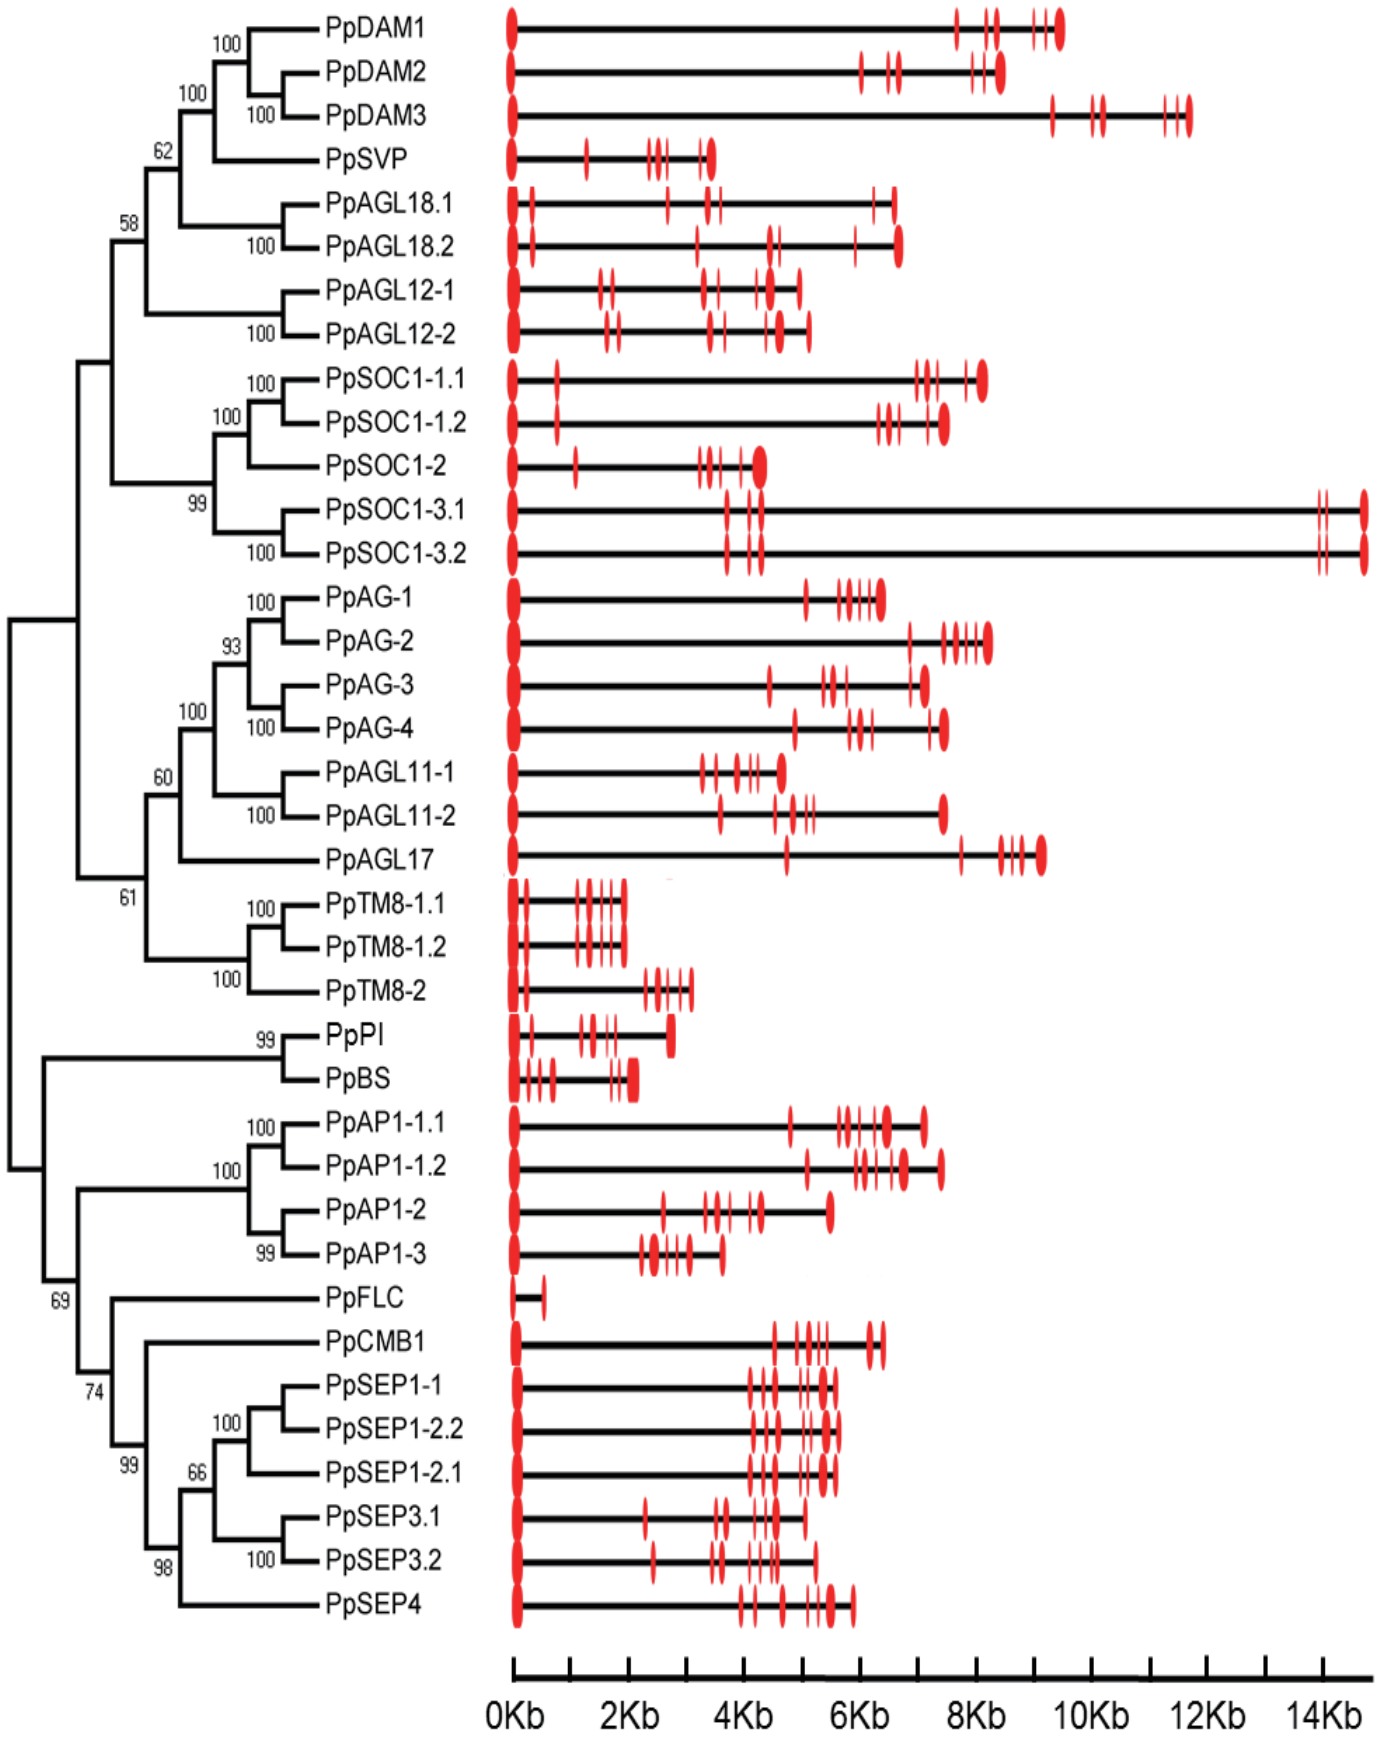

Figure S1

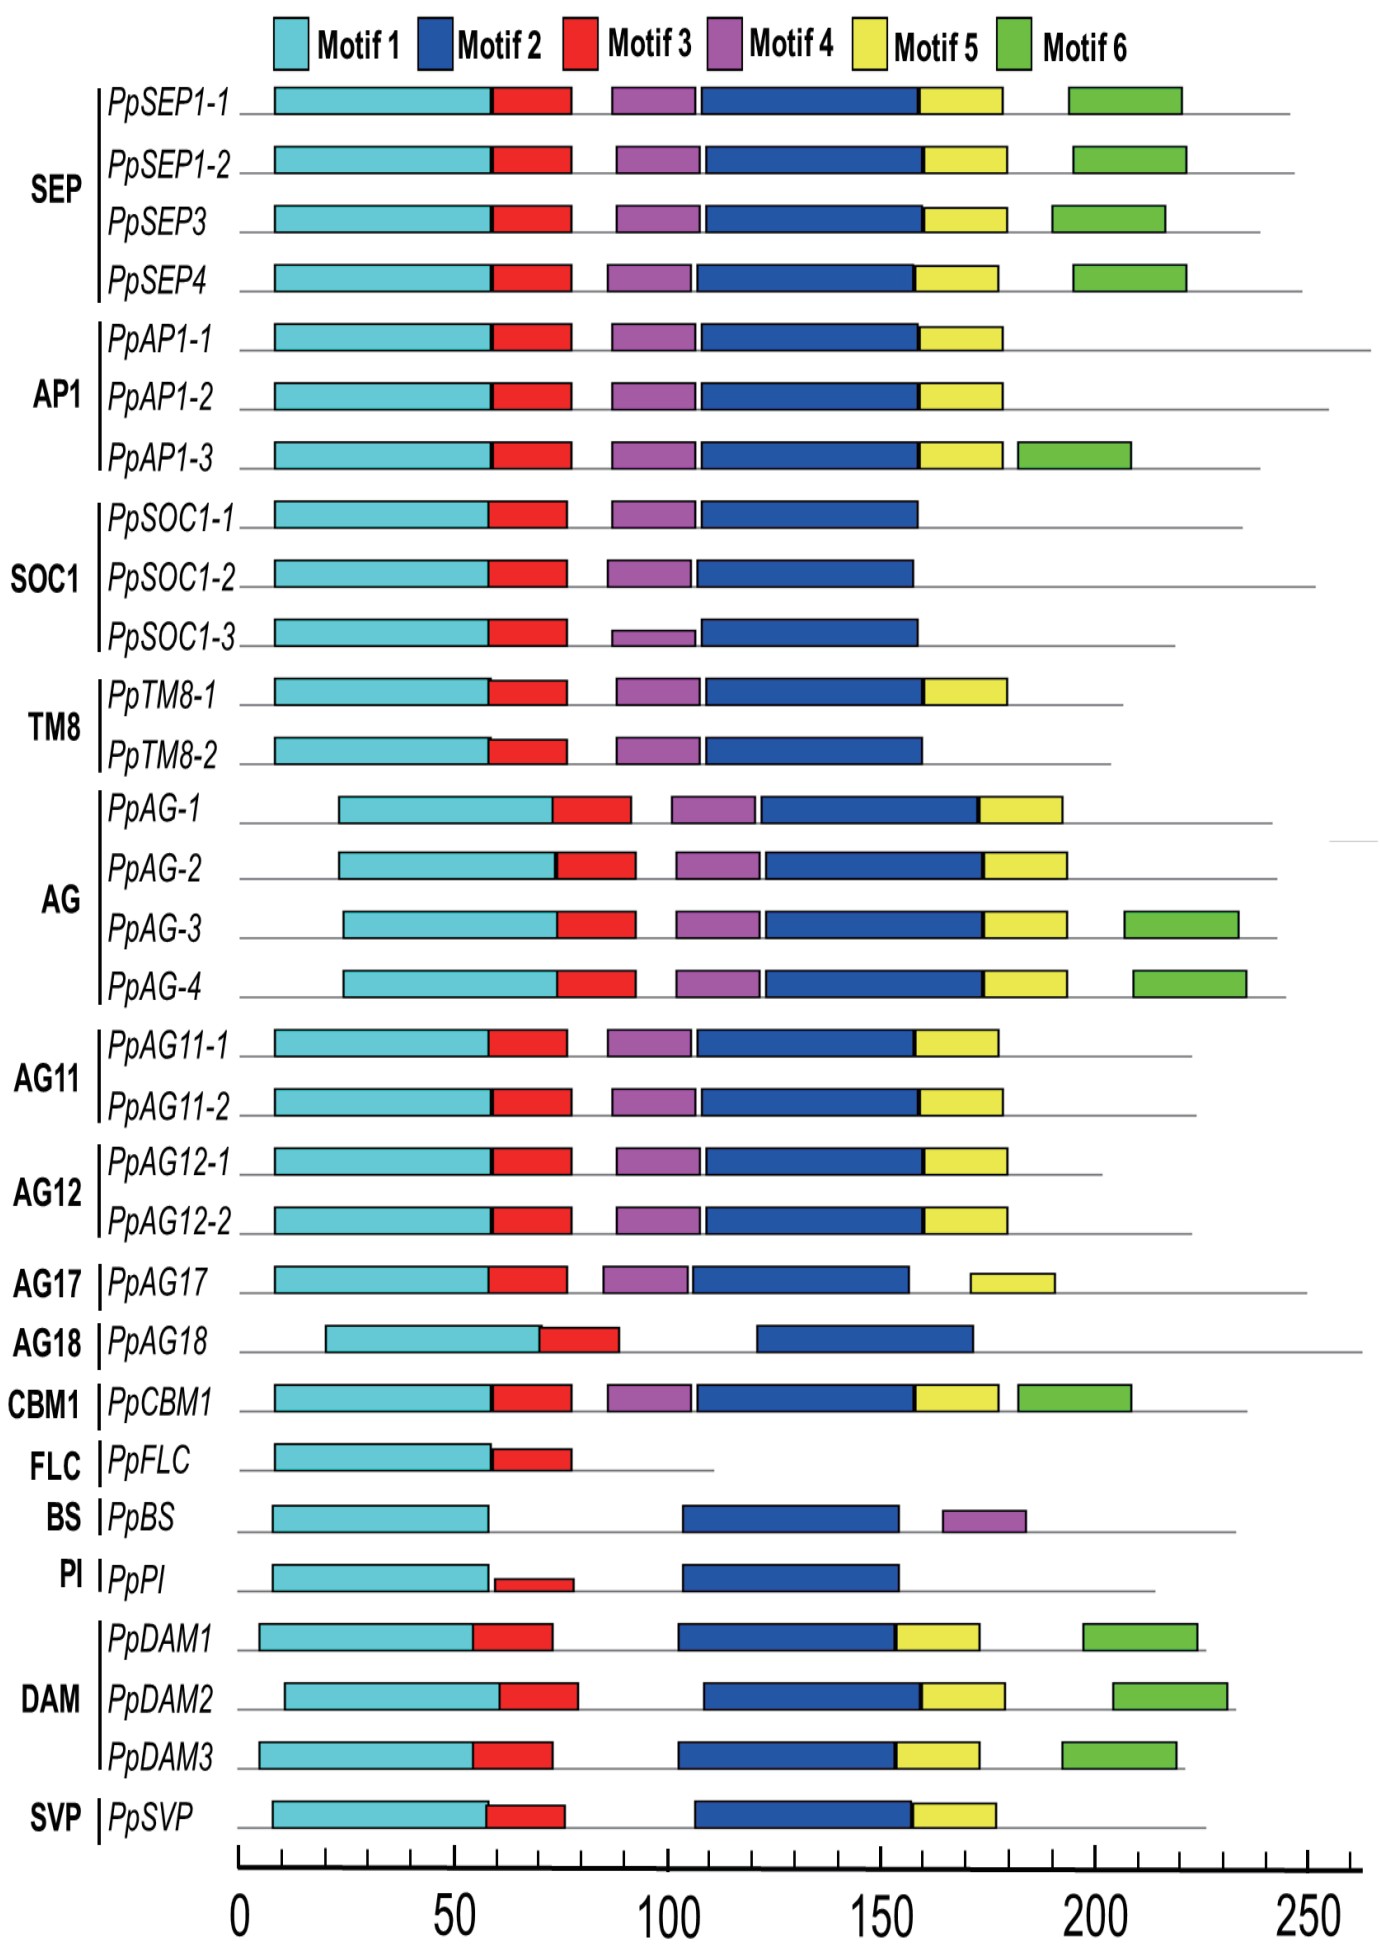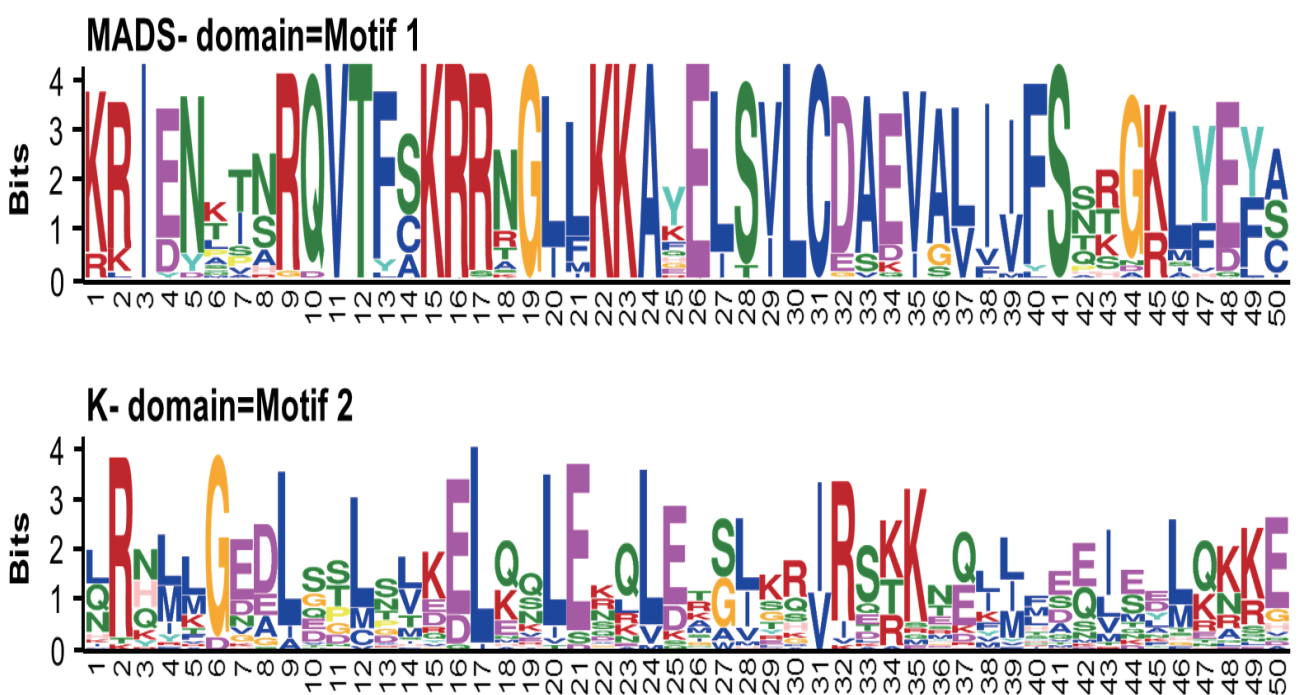

Figure S2

+ CTTAAACAA ACCAACGCCT AAACAAATC AACATTGAGT CGCATGAAGA GATTTTCAGAG AAGAGGAAGG  
 - GAATTTGTT TGGTTGCGCA TTGTAAGTCA GCGTACTTCT CTAAGTCTC TTCTCTTCC

+ GAGGAATAGA AGTACCACGC ATAAATTTAT TATTTATAT AAATAATAA ATAAATAAAA GCATATGAAG  
 - CTCTTATCT TCATGGCTGG TATTAATAA ATAAATAATA TTTATTTAT TATTTATTTT CGTATACTTC

+ AGATTGCACT GCAGGGAAGA CGAGAGGGCC GGCCGGGATG GCAACCGTGG AAGAGGGTTT GGCCGACGGT  
 - TCTAAGCGGA CGTCCGCTGT GCTCTCCCGC CCGGCCCTAC CGTTGCCACC TTCTCCCAA CCGGCTGCCA

+ GGATGGCCGG TGTGTCAGCG ATTGCTGCTA CCGCTGCTCT TTAGGATAAA GAAGTGAGAG AGACGAGGTG  
 - CCTACCAGCC ACAACCTGCG TAACGACGAT GGCGACGAGA AATCCTATT CTTCCTCTC TCTGCTCCAC

+ GATGNSAGCA CACCTAAAAA GAAATAAAC GAGAATCCCC ACTCAGTTAG ATATGAACAA ATCTAAGAGA  
 - CTACACTGCT GTGATTTTCT CTTTATTGG CTCTTAGGGG TGAGTCAATC TATACTTGT TAGATTTCTT

+ TTCCATATTT TACTGTGCT CATTCCACA TATATTATGA ACGGTGGTGA TCGCATTGAT CACTCATCAC  
 - AAGGTATAAA AATGACAGCA GGTAAAGGTG ATATAATACT TGCCACCACT AGCGTAAAGTA GTGAGTAGTG

+ GCCAATGAT TTGCGTCCA CGTTCTTAC CTTAAAAATA TCCAAAAATA GGAAAGGAA ACAACAGTT  
 - CCGTGGACTA AAGCAAGGT CCAAGAATG GAATTTTAT AGGTTTTTAT CCTTCTCTT TGTGTGCAA

+ GATATTAAG CGAGATATAT CTTATTTTC TATAAATAG AAATTAAT CGCCAACCTA TCCTTTCTAG  
 - CTATAATTC GCTCTATATA GAATAAAAAG ATATTTATCC TTAAATAA GCGGTGGAT AGGAAAGATC

+ AACCAACGGC AGCACCCGAA CTCTCTCTCT CCTCTCTGTT CTCTCTTTC CAAAATATCT TTGGTTCTCT  
 - TTGTTGGCCG TCGTCCGCTT GAGAGAGAGA GGAGAGACAA GAAGAGAAAG GTTTATAGA AACCAAAGGA

+ TTCACTGCTC TGCAAAATTC CCAAACTTC AGACCTGAAA CTCGCCGACG AAGGTAAACA AATAACAACG  
 - AAGTGACGAG ACCTTTAAAG GGTTTGGAAG TCTGGACTTT GAGGGGCTGC TTCCATTGT TTATTGTTGC

+ GAAAACCCAG TAAATAATTT ATGTATGGTT TTTTTTTTTC TTCTCTCTT CGATTGGTGG TAAATACAAA  
 - CTTTGGGTC ATTTATATAA TACATACCAA AAAAAAAAAAG AAGAAGAGAA GCTAACACC ATTTATGTTT

+ ATACTTAGG CTGTTGGGC AGTTGTTGT GGTGGTGG TTTTCTGGG TTTGATTTT CTTATTTAGA  
 - TAPGAAATC GAACAACCCG TCAACAAACA CCAACCAACC AAAAAAGACC AAAAAATAAA GAATAAATCT

+ TCTGAGATGC TAGGGTTTGA GGTCAATATC TTTAACTTA TAAAAATACC CAGAAAAAT ACGGTAGTTT  
 - AGACTCTACG ATCCCAAAC CCAAGTTATAG AAATTTGAAT ATTTTATGG GTCTTTTATA TGCCATCAAA

+ TTGAGTTGT GAACAGTTAT ATATGTGAAA AGTGCATGGT TGGTTTATTT TTTATTTATTT GATTAATG  
 - AACTCAACA CTTGCAATA TATACACTTT TCACGTACCA ACCAAATAAA AATAAATAAA CTTAATTAAC

+ TTTTGAAGG GGTAGGAAGA  
 - AAAAATCC CCATCTCT

+ 5UTR Py-rich stretch  
 + AAGAA-motif  
 + ACE

| Site Name | Organism              | Position | Strand | Matrix score. | sequence   | function                                            |
|-----------|-----------------------|----------|--------|---------------|------------|-----------------------------------------------------|
| ACE       | Petroselinum hortense | 437      | -      | 7             | ACGTGGA    | cis-acting element involved in light responsiveness |
| ACE       | Petroselinum crispum  | 770      | -      | 9             | CTAACGTATT | cis-acting element involved in light responsiveness |

| Site Name | Organism             | Position | Strand | Matrix score. | sequence | function                            |
|-----------|----------------------|----------|--------|---------------|----------|-------------------------------------|
| AE-box    | Arabidopsis thaliana | 477      | +      | 8             | AGAAACAA | part of a module for light response |

| Site Name | Organism | Position | Strand | Matrix score. | sequence | function                                                            |
|-----------|----------|----------|--------|---------------|----------|---------------------------------------------------------------------|
| ARE       | Zea mays | 9        | -      | 6             | TGGTTT   | cis-acting regulatory element essential for the anaerobic induction |
| ARE       | Zea mays | 951      | +      | 6             | TGGTTT   | cis-acting regulatory element essential for the anaerobic induction |
| ARE       | Zea mays | 726      | +      | 6             | TGGTTT   | cis-acting regulatory element essential for the anaerobic induction |
| ARE       | Zea mays | 622      | +      | 6             | TGGTTT   | cis-acting regulatory element essential for the anaerobic induction |
| ARE       | Zea mays | 808      | +      | 6             | TGGTTT   | cis-acting regulatory element essential for the anaerobic induction |

| Site Name | Organism             | Position | Strand | Matrix score. | sequence | function                                                        |
|-----------|----------------------|----------|--------|---------------|----------|-----------------------------------------------------------------|
| Box 4     | Petroselinum crispum | 973      | +      | 6             | ATTAT    | part of a conserved DNA module involved in light responsiveness |

| Site Name | Organism             | Position | Strand | Matrix score. | sequence | function                           |
|-----------|----------------------|----------|--------|---------------|----------|------------------------------------|
| Box-W1    | Petroselinum crispum | 861      | -      | 6             | TTGACC   | fungal elicitor responsive element |

| Site Name    | Organism             | Position | Strand | Matrix score. | sequence | function                                                            |
|--------------|----------------------|----------|--------|---------------|----------|---------------------------------------------------------------------|
| C-repeat/DRE | Arabidopsis thaliana | 200      | +      | 8             | TGGCCGAC | regulatory element involved in cold- and dehydration-responsiveness |

| Site Name | Organism             | Position | Strand | Matrix score. | sequence | function                                                   |
|-----------|----------------------|----------|--------|---------------|----------|------------------------------------------------------------|
| CAAT-box  | Hordeum vulgare      | 143      | -      | 4             | CAAT     | common cis-acting element in promoter and enhancer regions |
| CAAT-box  | Arabidopsis thaliana | 753      | -      | 5             | CCAAT    | common cis-acting element in promoter and enhancer regions |
| CAAT-box  | Brassica rapa        | 643      | +      | 5             | CAAT     | common cis-acting element in promoter and enhancer regions |
| CAAT-box  | Hordeum vulgare      | 977      | -      | 4             | CAAT     | common cis-acting element in promoter and enhancer regions |
| CAAT-box  | Brassica rapa        | 338      | +      | 5             | CAAT     | common cis-acting element in promoter and enhancer regions |
| CAAT-box  | Brassica rapa        | 967      | +      | 5             | CAAT     | common cis-acting element in promoter and enhancer regions |
| CAAT-box  | Brassica rapa        | 689      | +      | 5             | CAAT     | common cis-acting element in promoter and enhancer regions |
| CAAT-box  | Hordeum vulgare      | 864      | +      | 4             | CAAT     | common cis-acting element in promoter and enhancer regions |
| CAAT-box  | Hordeum vulgare      | 231      | -      | 4             | CAAT     | common cis-acting element in promoter and enhancer regions |
| CAAT-box  | Glycine max          | 976      | -      | 5             | CAAT     | common cis-acting element in promoter and enhancer regions |
| CAAT-box  | Brassica rapa        | 429      | -      | 5             | CAAT     | common cis-acting element in promoter and enhancer regions |

| Site Name  | Organism | Position | Strand | Matrix score. | sequence | function                           |
|------------|----------|----------|--------|---------------|----------|------------------------------------|
| CATT-motif | Zea mays | 403      | +      | 6             | GCAATC   | part of a light responsive element |

| Site Name | Organism        | Position | Strand | Matrix score. | sequence | function           |
|-----------|-----------------|----------|--------|---------------|----------|--------------------|
| CCAAT-box | Hordeum vulgare | 182      | +      | 6             | CAACGG   | MYBvl binding site |
| CCAAT-box | Hordeum vulgare | 696      | +      | 6             | CAACGG   | MYBvl binding site |

| Site Name   | Organism        | Position | Strand | Matrix score. | sequence | function                                                          |
|-------------|-----------------|----------|--------|---------------|----------|-------------------------------------------------------------------|
| CGTCA-motif | Hordeum vulgare | 285      | -      | 5             | CGTCA    | cis-acting regulatory element involved in the MeJA-responsiveness |

| Site Name | Organism      | Position | Strand | Matrix score. | sequence | function                                                       |
|-----------|---------------|----------|--------|---------------|----------|----------------------------------------------------------------|
| G-Box     | Pisum sativum | 439      | +      | 6             | CACGTT   | cis-acting regulatory element involved in light responsiveness |

| Site Name | Organism | Position | Strand | Matrix score. | sequence | function                                                       |
|-----------|----------|----------|--------|---------------|----------|----------------------------------------------------------------|
| G-box     | Zea mays | 439      | +      | 6             | CACGTT   | cis-acting regulatory element involved in light responsiveness |

| Site Name | Organism             | Position | Strand | Matrix score. | sequence | function                           |
|-----------|----------------------|----------|--------|---------------|----------|------------------------------------|
| GAG-motif | Arabidopsis thaliana | 580      | -      | 7             | AGAGAGT  | part of a light responsive element |

| Site Name | Organism                | Position | Strand | Matrix score. | sequence     | function                           |
|-----------|-------------------------|----------|--------|---------------|--------------|------------------------------------|
| L-box     | Lycopersicon esculentum | 949      | -      | 11            | AAATTAACCAAC | part of a light responsive element |

| Site Name | Organism             | Position | Strand | Matrix score. | sequence | function                                          |
|-----------|----------------------|----------|--------|---------------|----------|---------------------------------------------------|
| MBS       | Arabidopsis thaliana | 324      | -      | 6             | TAACTG   | MYB binding site involved in drought-inducibility |
| MBS       | Arabidopsis thaliana | 924      | -      | 6             | TAACTG   | MYB binding site involved in drought-inducibility |
| MBS       | Arabidopsis thaliana | 486      | -      | 6             | TAACTG   | MYB binding site involved in drought-inducibility |
| MBS       | Arabidopsis thaliana | 423      | +      | 6             | TAACTG   | MYB binding site involved in drought-inducibility |
| MBS       | Arabidopsis thaliana | 790      | +      | 6             | TAACTG   | MYB binding site involved in drought-inducibility |

| Site Name | Organism | Position | Strand | Matrix score. | sequence   | function                                                             |
|-----------|----------|----------|--------|---------------|------------|----------------------------------------------------------------------|
| O2-site   | Zea mays | 417      | -      | 9             | GTTGACGTGA | cis-acting regulatory element involved in zein metabolism regulation |

| Site Name | Organism | Position | Strand | Matrix score. | sequence   | function                 |
|-----------|----------|----------|--------|---------------|------------|--------------------------|
| Sp1       | Zea mays | 69       | -      | 5             | CC(G/A)CCC | light responsive element |

| Site Name   | Organism          | Position | Strand | Matrix score. | sequence  | function                                                     |
|-------------|-------------------|----------|--------|---------------|-----------|--------------------------------------------------------------|
| TATA-box    | Nicotiana tabacum | 353      | +      | 9             | CCATCTTTT | cis-acting element involved in salicylic acid responsiveness |
| TCA-element | Brassica oleracea | 739      | -      | 9             | GAGAGGATA | cis-acting element involved in salicylic acid responsiveness |
| TCA-element | Brassica oleracea | 597      | -      | 9             | GAGAGGATA | cis-acting element involved in salicylic acid responsiveness |

| Site Name     | Organism             | Position | Strand | Matrix score. | sequence | function                           |
|---------------|----------------------|----------|--------|---------------|----------|------------------------------------|
| TCCACCT-motif | Arabidopsis thaliana | 445      | +      | 6             | TCTTAC   | part of a light responsive element |

| Site Name   | Organism        | Position | Strand | Matrix score. | sequence | function                                                          |
|-------------|-----------------|----------|--------|---------------|----------|-------------------------------------------------------------------|
| TGACG-motif | Hordeum vulgare | 285      | +      | 5             | TGACG    | cis-acting regulatory element involved in the MeJA-responsiveness |

| Site Name  | Organism | Position | Strand | Matrix score. | sequence | function |
|------------|----------|----------|--------|---------------|----------|----------|
| Unnamed_1  |          |          |        |               |          |          |
| Unnamed_11 |          |          |        |               |          |          |
| Unnamed_2  |          |          |        |               |          |          |
| Unnamed_3  |          |          |        |               |          |          |
| Unnamed_4  |          |          |        |               |          |          |
| W box      |          |          |        |               |          |          |
| WUN-motif  |          |          |        |               |          |          |

| Site Name | Organism          | Position | Strand | Matrix score. | sequence | function                 |
|-----------|-------------------|----------|--------|---------------|----------|--------------------------|
| WUN-motif | Brassica oleracea | 528      | -      | 9             | AAATTCCT | wound-responsive element |

| Site Name | Organism                | Position | Strand | Matrix score. | sequence  | function                                                    |
|-----------|-------------------------|----------|--------|---------------|-----------|-------------------------------------------------------------|
| circadian | Lycopersicon esculentum | 614      | -      | 9             | CAAGATATC | cis-acting regulatory element involved in circadian control |

Figure S3

```

+ ATTTATTTAA ATTAATAAAA TCATATGAAG ATATTGCTTT GCAGAGAAGA CGAAGGGGCC GGGATGGCAA
- TAAATAAATT TAATTATTTT AGTATACTTC TATAACGAAA CGTCTCTTCT GCTTCCCCGG CCTTACCGTT

+ TGGTGAAGA GGGTTGGAG AATGCGGCTA CTGAAACTCG GGGTTGGGG TTTGGGGAGT TTTGTTTCAC
- ACCACCTTCT CCCAAACCTC TTACGCCGAT GACTTTGAGC CCCCACCCC AAACCCCTCA AAACAAAGTG

+ AAGTGGGAGT GAGTATTGCC AGCAAGTGT GCAGCGATCG CTGCTACCGT TGCTGTTTGG GATAAAGAAG
- TTCACCTCA CTCATAACGG TCGTTCACAA CGTCGCTAGC GACGATGGCG ACGACAAACC CTATTTCTTC

+ TGAGAGAGAC GAAGTGGGTG AGGAAAATCA ACGGTGTGGT ACGTAAAAAG AATTAACGT AGAATCCCCA
- ACTCTCTG CTTACCCAC TCCTTTAGT TGCACACCA TGCAATTTTC TTAATTTGCA TCTTAGGGT

+ GCCTTACTGT CGTCCAGTCC ACATATTATA GACGGTCTG ATCGCATTCA TGACTCATCA CACCAACTGA
- CGGAATGACA GCAGGTGAGG TGATAATAT CTGCCAGCAC TAGCGTAAGT ACTGAGTAGT GTGGTTGACT

+ FTTGTGTTCC GCGTTTCTAA CCTTATGTTT CCAAAAATA TCTAAAAAGA CAAAAAGGCA CAAACAGTGA
- AAACACAAGG CGCAAAGATT GGAATACAAG GGTTTTTTAT AGATTTTTCT GTTTTTCCGT GTTTGCTACT

+ TAACCAAAGG AAGTATGTC CTATTTTCC ATAATTAGGA AAATTAATTT AGCAACCTTT CCTTTCTTGA
- ATTTGTTTCC TTCTATACAG GATAAAAAGG TATTAATCCT TTAATTAATA TCGTTGGAAA GGAAGAAGCT

+ ACTGCCGGCA GCATCCCAAC TCTTCTCAT CTCTCTCTT CTCTTTCCAG AATTGCTGGC TTTTCTTCG
- TGACGGCCGT CGTAGGGTTG AGAAAGAGTA GAGAGAAGAA GAGAAAGGTC TTAACGACC GAAAGAAAGC

+ CTGTCTGCA AATTCCTGA AACTTCAGAG ACCTAAAACC CCCCACGAA GGTAACAAG TAACAACGGA
- GACAAGAGCT TTAAGGGCT TTGAAGTCTC TGGATTTGG GGGTTGCTT CCATTTGTTT ATGTTGCTT

+ AAACCCAGTG TAATTAATTT ATGTATGGTC TTCTCTCTC TCCCTCTTCT TCTTCTCTT ATGGTAGATA
- TTTGGTCTC ATTAATTAATA TACATACCAG AAGGAGGAGG AGGGGAAGA AGAAGAAGAA TACCATCTAT

+ CTGTAGGCTT GTTGGACAGT TGATTGTGGT GGGTTTTCT GGGTTTTGT TTTCTTTATA GATCTGAGAT
- GACATCCGAA CAACCTGTCA ACTAACACCA CCAAAAAGA CCCCACCAA AAAGAAATAT CTAGACTCTA

+ GCTAGGGTTT GAGGGCAATA ATCTCTTATT TAGATCTGAG ATTCTAGGGT TTGAGTCAA GAATCTTTAA
- CGATCCCAA CTCCCGTAT TAGAGAATA ATCTAGACT TAAGATCCCA AACTCCAGTT CTAGAAATT

+ AATTATAAT AAAAAAAT ATATGCTAGT TTTGAGTTT GTGGACGAT ATATATATGT GAAAAGTGGT
- TTAATATTTA TTTTTTTTA TATACGATCA AAAACTCAA CACCTGCTAA TATATATACA CTTTCCACA

+ TGTTTTATTT TATTTATTTG AATTAATTTG TTTGACGGG GTAGCAAGAA ATGGTGGAAA GGATGAAAGA
- ACAAATAAAA ATAAATAAAC TTAATTAACA AAAACGTCC CATCGTTCTT TACCACCTTT CCTACTTCT

+ GAAGATAAAG ATCAGGAGGA
- CTTCTATTTC TAGTCTCTCT

```

 5UTR Py-rich stretch  
 AAGAA-motif  
 Box 4

| Site Name             | Organism             | Position | Strand | Matrix score. | sequence | function                                                        |
|-----------------------|----------------------|----------|--------|---------------|----------|-----------------------------------------------------------------|
| <a href="#">Box 4</a> | Petroselinum crispum | 11       | +      | 6             | ATTAAT   | part of a conserved DNA module involved in light responsiveness |
| <a href="#">Box 4</a> | Petroselinum crispum | 643      | +      | 6             | ATTAAT   | part of a conserved DNA module involved in light responsiveness |
| <a href="#">Box 4</a> | Petroselinum crispum | 463      | +      | 6             | ATTAAT   | part of a conserved DNA module involved in light responsiveness |
| <a href="#">Box 4</a> | Petroselinum crispum | 932      | +      | 6             | ATTAAT   | part of a conserved DNA module involved in light responsiveness |

 Box-W1

| Site Name              | Organism             | Position | Strand | Matrix score. | sequence | function                           |
|------------------------|----------------------|----------|--------|---------------|----------|------------------------------------|
| <a href="#">Box-W1</a> | Petroselinum crispum | 825      | -      | 6             | TTGACC   | fungus elicitor responsive element |

 CAAT-box  
 CATT-motif

| Site Name                  | Organism | Position | Strand | Matrix score. | sequence | function                           |
|----------------------------|----------|----------|--------|---------------|----------|------------------------------------|
| <a href="#">CATT-motif</a> | Zea mays | 90       | -      | 6             | GCATTC   | part of a light responsive element |
| <a href="#">CATT-motif</a> | Zea mays | 324      | +      | 6             | GCATTC   | part of a light responsive element |

 CCAAT-box

| Site Name                 | Organism        | Position | Strand | Matrix score. | sequence | function            |
|---------------------------|-----------------|----------|--------|---------------|----------|---------------------|
| <a href="#">CCAAT-box</a> | Hordeum vulgare | 239      | +      | 6             | CAACGG   | MYBHv1 binding site |
| <a href="#">CCAAT-box</a> | Hordeum vulgare | 624      | +      | 6             | CAACGG   | MYBHv1 binding site |

 G-box

| Site Name             | Organism | Position | Strand | Matrix score. | sequence | function                                                       |
|-----------------------|----------|----------|--------|---------------|----------|----------------------------------------------------------------|
| <a href="#">G-box</a> | Zea mays | 315      | -      | 6             | CACGAC   | cis-acting regulatory element involved in light responsiveness |

 GA-motif

| Site Name                | Organism    | Position | Strand | Matrix score. | sequence | function                           |
|--------------------------|-------------|----------|--------|---------------|----------|------------------------------------|
| <a href="#">GA-motif</a> | Glycine max | 427      | +      | 8             | AAGGAAGA | part of a light responsive element |

 GAG-motif

| Site Name                 | Organism          | Position | Strand | Matrix score. | sequence | function                           |
|---------------------------|-------------------|----------|--------|---------------|----------|------------------------------------|
| <a href="#">GAG-motif</a> | Spinacia oleracea | 518      | -      | 7             | AGAGATG  | part of a light responsive element |

 GC-motif

| Site Name                | Organism | Position | Strand | Matrix score. | sequence | function                                                       |
|--------------------------|----------|----------|--------|---------------|----------|----------------------------------------------------------------|
| <a href="#">GC-motif</a> | Zea mays | 109      | -      | 6             | CCCCGG   | enhancer-like element involved in anoxic specific inducibility |

 GCN4\_motif

| Site Name                  | Organism     | Position | Strand | Matrix score. | sequence | function                                                |
|----------------------------|--------------|----------|--------|---------------|----------|---------------------------------------------------------|
| <a href="#">GCN4_motif</a> | Oryza sativa | 331      | -      | 7             | TGAGTCA  | cis-regulatory element involved in endosperm expression |

 HSE

| Site Name           | Organism          | Position | Strand | Matrix score. | sequence  | function                                                  |
|---------------------|-------------------|----------|--------|---------------|-----------|-----------------------------------------------------------|
| <a href="#">HSE</a> | Brassica oleracea | 383      | +      | 9             | AAAAAATTC | cis-acting element involved in heat stress responsiveness |

 LTR

| Site Name           | Organism        | Position | Strand | Matrix score. | sequence | function                                                      |
|---------------------|-----------------|----------|--------|---------------|----------|---------------------------------------------------------------|
| <a href="#">LTR</a> | Hordeum vulgare | 577      | +      | 6             | CCGAAA   | cis-acting element involved in low-temperature responsiveness |

 MBS

| Site Name           | Organism             | Position | Strand | Matrix score. | sequence | function                                          |
|---------------------|----------------------|----------|--------|---------------|----------|---------------------------------------------------|
| <a href="#">MBS</a> | Arabidopsis thaliana | 344      | +      | 6             | CAACTG   | MYB binding site involved in drought-inducibility |
| <a href="#">MBS</a> | Arabidopsis thaliana | 717      | -      | 6             | CAACTG   | MYB binding site involved in drought-inducibility |

 Skn-1\_motif

| Site Name                   | Organism     | Position | Strand | Matrix score. | sequence | function                                                        |
|-----------------------------|--------------|----------|--------|---------------|----------|-----------------------------------------------------------------|
| <a href="#">Skn-1_motif</a> | Oryza sativa | 330      | -      | 5             | GTCAT    | cis-acting regulatory element required for endosperm expression |

 Sp1

| Site Name           | Organism | Position | Strand | Matrix score. | sequence   | function                 |
|---------------------|----------|----------|--------|---------------|------------|--------------------------|
| <a href="#">Sp1</a> | Zea mays | 599      | +      | 5             | CC(G/A)CCC | light responsive element |
| <a href="#">Sp1</a> | Zea mays | 669      | +      | 5             | CC(G/A)CCC | light responsive element |

 TATA-box

 TATC-box

| Site Name                | Organism     | Position | Strand | Matrix score. | sequence | function                                                  |
|--------------------------|--------------|----------|--------|---------------|----------|-----------------------------------------------------------|
| <a href="#">TATC-box</a> | Oryza sativa | 198      | -      | 7             | TATCCCA  | cis-acting element involved in gibberellin-responsiveness |

 TC-rich repeats

| Site Name                       | Organism          | Position | Strand | Matrix score. | sequence  | function                                                         |
|---------------------------------|-------------------|----------|--------|---------------|-----------|------------------------------------------------------------------|
| <a href="#">TC-rich repeats</a> | Nicotiana tabacum | 229      | -      | 9             | ATTTCTTCA | cis-acting element involved in defense and stress responsiveness |

 TCA-element

| Site Name                   | Organism          | Position | Strand | Matrix score. | sequence   | function                                                     |
|-----------------------------|-------------------|----------|--------|---------------|------------|--------------------------------------------------------------|
| <a href="#">TCA-element</a> | Brassica oleracea | 524      | -      | 9             | GAGAAGAATA | cis-acting element involved in salicylic acid responsiveness |

 Unnamed\_4

 W box

 chs-Unit 1 ml

| Site Name                     | Organism             | Position | Strand | Matrix score. | sequence    | function                           |
|-------------------------------|----------------------|----------|--------|---------------|-------------|------------------------------------|
| <a href="#">chs-Unit 1 ml</a> | Arabidopsis thaliana | 244      | -      | 10            | ACCTACCACAC | part of a light responsive element |

Figure S4

+ AATAGTGGAT CTGAGAGAGA TCGAGTAGTT GAAGAGAGGG GGGGTGGGG GCAGTGGGAA TCAAATCCAT  
 - TTATCACTCA GACTCTCTCT AGCTCATCAA CTCTCTCCC CCCACCCCG CGTCACCTTC AGTTTAGGTA  
 + CAGGTGGGC CGACTCCACG TGAACCTCGGA TAAACACCGT ACCGTAFAAC TGAAAACCG GTTCGGTTTT  
 - GTCCACACCG GCTGAGGTGC ACTTGAGCCT ATTTGTGGCA TGGCATATTG ACCTTTTGGC CAAGCCAAAA  
 + GCACCGTACC AAAGTAAAT AAGAAAAAAA AAACAAACCA AACCGATCAG TTATTTTCCG GTTCGATACT  
 - CGTGGCATGG TTTCAATTA TTTCTTTTTT TTTGTTTGGT TTGGCTAGTC AATAAAAGGC CAAGCTATGA  
 + ATATCTCCAT TCCCTCCACC GCCCATTTC CTTCCTTCT ATCAGCCACC TGTACGTGF CAACTCACA  
 - TATAGAGGTA AGGGAGGTGG CGGGTAAAG GAAAGGAAGA TAGTCGGTGG ACAATGCACA GTTGACGTGT  
 + AGCATCGACT GAGGAAGAAG CAGCTTAGC AACTAGCAAG TGATGCTAGC ATCTCTCAA AAAGTGGGAC  
 - TCGTAGCTGA CTCTCTTTC GTCGAAATCG TTGATCGTTC ACTACGATCG TAGAGAGTTT TTTACCCTG  
 + ACGTGAAGA AATAGGCTA AACCGACAAT AAACGGTGG ATAGCATTCA TCACACCAAC CGCATCGATC  
 - TGCACITTTT TTTATCCGAT TTGGCTGTTA TTTGCCACC TATCGTAAAT AGTGTGGTTG GCGTAGCTAG  
 + ACCGTGGAT ATCGTTCCAT GTTCTTACG TTATTTGCCC AACAAAATAT CCAAAAATAT TAAAAATAGA  
 - TGGCAACTAA TAGCAAGTA CAAAGATATG AATAAACGGG TTGTTTTATA GTTTTATAG ATTTTTATCT  
 + AAAAGCAACA AACAGCGGAT ATTAATAAAA GATTTATCCA AGTCTTCCA TATATGGGAA AATTCAATTA  
 - TTTTCGTTGT TTGTCGCCA TAATTTATTT CTAAATAGGT TCCAGAAGGT ATATACCCTT TTAAGTAAAT  
 + GCGACCTTC CTTCCTGAA CAGCCTGCAG CACCACTCT CTCTCTCTCC TCAGTCTTCT CCTCTTCCA  
 - CCGTGGAAAG GAAAGAACTT GTCCGACGTC GTGGTGGAGA GAGAGAGAGG AGTCAGAAGA GGAGAAAGGT  
 + AAATTGCTCC GAAAATTTCC AGTTACAGCC TAAACTTCAG ACCTAAGACC CCTCAACGAA GGTAAACAA  
 - TTTAACGAGG CTTTTAAGT TCAAGTCTGG ATTTGAAGTC TGGATTCTGG GGAGTGTCT CCATTTGTTT  
 + AGAACCAGG GTGAACCCAG TACTTAGTAT ATCTATGTTT TTCTTCTTT TTTTTCTTT TTTCTTCTA  
 - TCTTGTCTC CACTTGGTTC ATGAATCAAA TAGATCAAAA AAGGAAGAAA AAAAAAGAAA AAAGGAAGAT  
 + TTAATGGTGA ATACTAAAA CTCTAGGCTT GTCTGGCAGT TGATTGTTGG TGGTGGTTG ATCTGTGTTT  
 - AATTACCAC TATGATTTTT GAGATCCGAA CAGACCCTCA ACTAACACCA ACCACCCAAC TAGACACAAA  
 + TATTTACTT ATTTAGATCT GAGATATGTT AGGGTATGAG GTCAATAATC TTAATAATAT CAGAAACCA  
 - ATAAAAATG TAAATCTAGA CTCTATACAA TCCCATACT CAGTTATTAG AATTTTAATA GTCTTTGGGT  
 + GAAAATATAC TGAGTTTGT GAAACATTA TATATATATG TGGAAATTA AAGTATTTG TTTATTTAT  
 - CTTTTATATG ACATCAAACA CTTGTAAAT ATATATATAC ACCTTTAAAT TTCACTAAC AATAAATA  
 + TTTATTTGAA TTATTGTTTT  
 - AAATAAACTT AATAACAAA

+ 4c1-CMA2b

| Site Name | Organism             | Position | Strand | Matrix score. | sequence   | function                 |
|-----------|----------------------|----------|--------|---------------|------------|--------------------------|
| 4c1-CMA2b | Petroselinum crispum | 401      | +      | 10            | TCTCACCACC | light responsive element |

+ AAGAA-motif  
+ ABRE

| Site Name | Organism             | Position | Strand | Matrix score. | sequence | function                                                        |
|-----------|----------------------|----------|--------|---------------|----------|-----------------------------------------------------------------|
| ABRE      | Arabidopsis thaliana | 87       | +      | 6             | CACGTG   | cis-acting element involved in the abscisic acid responsiveness |
| ABRE      | Arabidopsis thaliana | 350      | +      | 6             | CACGTG   | cis-acting element involved in the abscisic acid responsiveness |
| ABRE      | Arabidopsis thaliana | 264      | +      | 6             | TACGTG   | cis-acting element involved in the abscisic acid responsiveness |

+ AC-I  
+ ACE

| Site Name | Organism              | Position | Strand | Matrix score. | sequence | function                                            |
|-----------|-----------------------|----------|--------|---------------|----------|-----------------------------------------------------|
| ACE       | Petroselinum hortense | 85       | -      | 7             | ACGTGGA  | cis-acting element involved in light responsiveness |

+ AE-box

| Site Name | Organism             | Position | Strand | Matrix score. | sequence | function                            |
|-----------|----------------------|----------|--------|---------------|----------|-------------------------------------|
| AE-box    | Arabidopsis thaliana | 439      | -      | 8             | AGAAACAT | part of a module for light response |

+ ARE

| Site Name | Organism | Position | Strand | Matrix score. | sequence | function                                                            |
|-----------|----------|----------|--------|---------------|----------|---------------------------------------------------------------------|
| ARE       | Zea mays | 175      | -      | 6             | TGGTTT   | cis-acting regulatory element essential for the anaerobic induction |
| ARE       | Zea mays | 968      | +      | 6             | TGGTTT   | cis-acting regulatory element essential for the anaerobic induction |

+ Box 4

| Site Name | Organism             | Position | Strand | Matrix score. | sequence | function                                                        |
|-----------|----------------------|----------|--------|---------------|----------|-----------------------------------------------------------------|
| Box 4     | Petroselinum crispum | 511      | +      | 6             | ATTAAT   | part of a conserved DNA module involved in light responsiveness |
| Box 4     | Petroselinum crispum | 770      | +      | 6             | ATTAAT   | part of a conserved DNA module involved in light responsiveness |

+ Box-W1

| Site Name | Organism             | Position | Strand | Matrix score. | sequence | function                           |
|-----------|----------------------|----------|--------|---------------|----------|------------------------------------|
| Box-W1    | Petroselinum crispum | 880      | -      | 6             | TTGACC   | fungus elicitor responsive element |

+ C-repeat/DRE

| Site Name    | Organism             | Position | Strand | Matrix score. | sequence | function                                                            |
|--------------|----------------------|----------|--------|---------------|----------|---------------------------------------------------------------------|
| C-repeat/DRE | Arabidopsis thaliana | 77       | +      | 8             | TGGCCGAC | regulatory element involved in cold- and dehydration-responsiveness |

+ CAAT-box  
+ CATT-motif

| Site Name  | Organism | Position | Strand | Matrix score. | sequence | function                           |
|------------|----------|----------|--------|---------------|----------|------------------------------------|
| CATT-motif | Zea mays | 394      | +      | 6             | GCATTC   | part of a light responsive element |

+ CCAAT-box

| Site Name | Organism        | Position | Strand | Matrix score. | sequence | function            |
|-----------|-----------------|----------|--------|---------------|----------|---------------------|
| CCAAT-box | Hordeum vulgare | 422      | -      | 6             | CAACGG   | MYBHv1 binding site |

+ G-Box

| Site Name | Organism          | Position | Strand | Matrix score. | sequence | function                                                       |
|-----------|-------------------|----------|--------|---------------|----------|----------------------------------------------------------------|
| G-Box     | Pisum sativum     | 87       | +      | 6             | CACGTG   | cis-acting regulatory element involved in light responsiveness |
| G-Box     | Pisum sativum     | 350      | +      | 6             | CACGTG   | cis-acting regulatory element involved in light responsiveness |
| G-Box     | Antirrhinum majus | 264      | -      | 6             | CACGTA   | cis-acting regulatory element involved in light responsiveness |

+ G-box

| Site Name | Organism             | Position | Strand | Matrix score. | sequence | function                                                       |
|-----------|----------------------|----------|--------|---------------|----------|----------------------------------------------------------------|
| G-box     | Brassica napus       | 86       | -      | 7             | CACGTGG  | cis-acting regulatory element involved in light responsiveness |
| G-box     | Daucus carota        | 264      | +      | 6             | TACGTG   | cis-acting regulatory element involved in light responsiveness |
| G-box     | Arabidopsis thaliana | 87       | +      | 6             | CACGTG   | cis-acting regulatory element involved in light responsiveness |
| G-box     | Arabidopsis thaliana | 350      | +      | 6             | CACGTG   | cis-acting regulatory element involved in light responsiveness |

+ GA-motif

| Site Name | Organism             | Position | Strand | Matrix score. | sequence | function                           |
|-----------|----------------------|----------|--------|---------------|----------|------------------------------------|
| GA-motif  | Arabidopsis thaliana | 729      | -      | 8             | ATAGATAA | part of a light responsive element |

+ GAG-motif

| Site Name | Organism             | Position | Strand | Matrix score. | sequence | function                           |
|-----------|----------------------|----------|--------|---------------|----------|------------------------------------|
| GAG-motif | Spinacia oleracea    | 330      | -      | 7             | AGAGATG  | part of a light responsive element |
| GAG-motif | Arabidopsis thaliana | 596      | -      | 7             | AGAGAGT  | part of a light responsive element |

+ GT1-motif

| Site Name | Organism          | Position | Strand | Matrix score. | sequence    | function                 |
|-----------|-------------------|----------|--------|---------------|-------------|--------------------------|
| GT1-motif | Solanum tuberosum | 813      | +      | 10            | ATGGTGGTTGG | light responsive element |

+ I-box

| Site Name | Organism             | Position | Strand | Matrix score. | sequence  | function                           |
|-----------|----------------------|----------|--------|---------------|-----------|------------------------------------|
| I-box     | Arabidopsis thaliana | 427      | -      | 9             | acGATAATC | part of a light responsive element |

+ L-box

| Site Name | Organism             | Position | Strand | Matrix score. | sequence   | function                           |
|-----------|----------------------|----------|--------|---------------|------------|------------------------------------|
| L-box     | Petroselinum crispum | 401      | +      | 10            | TCTCACCACC | part of a light responsive element |

+ LTR

| Site Name | Organism        | Position | Strand | Matrix score. | sequence | function                                                      |
|-----------|-----------------|----------|--------|---------------|----------|---------------------------------------------------------------|
| LTR       | Hordeum vulgare | 639      | +      | 6             | CCGAAA   | cis-acting element involved in low-temperature responsiveness |

+ MBS

| Site Name | Organism             | Position | Strand | Matrix score. | sequence | function                                          |
|-----------|----------------------|----------|--------|---------------|----------|---------------------------------------------------|
| MBS       | Arabidopsis thaliana | 117      | +      | 6             | TAACGT   | MYB binding site involved in drought-inducibility |
| MBS       | Arabidopsis thaliana | 271      | +      | 6             | CAACTG   | MYB binding site involved in drought-inducibility |
| MBS       | Arabidopsis thaliana | 188      | -      | 6             | TAACGT   | MYB binding site involved in drought-inducibility |
| MBS       | Arabidopsis thaliana | 807      | -      | 6             | CAACTG   | MYB binding site involved in drought-inducibility |

+ Sp1

| Site Name | Organism     | Position | Strand | Matrix score. | sequence   | function                 |
|-----------|--------------|----------|--------|---------------|------------|--------------------------|
| Sp1       | Zea mays     | 38       | -      | 5             | CC(G/A)CCC | light responsive element |
| Sp1       | Oryza sativa | 229      | -      | 6             | GGGCGG     | light responsive element |
| Sp1       | Zea mays     | 42       | -      | 5.5           | CC(G/A)CCC | light responsive element |
| Sp1       | Zea mays     | 39       | -      | 5             | CC(G/A)CCC | light responsive element |
| Sp1       | Zea mays     | 46       | -      | 5             | CC(G/A)CCC | light responsive element |

+ TATA-box  
+ TATC-box

| Site Name | Organism     | Position | Strand | Matrix score. | sequence | function                                                  |
|-----------|--------------|----------|--------|---------------|----------|-----------------------------------------------------------|
| TATC-box  | Oryza sativa | 387      | -      | 7             | TATCCCA  | cis-acting element involved in gibberellin-responsiveness |

+ TCA-element

| Site Name   | Organism          | Position | Strand | Matrix score. | sequence  | function                                                     |
|-------------|-------------------|----------|--------|---------------|-----------|--------------------------------------------------------------|
| TCA-element | Nicotiana tabacum | 743      | +      | 9             | CCATCTTTT | cis-acting element involved in salicylic acid responsiveness |

+ TCT-motif

| Site Name | Organism             | Position | Strand | Matrix score. | sequence | function                           |
|-----------|----------------------|----------|--------|---------------|----------|------------------------------------|
| TCT-motif | Arabidopsis thaliana | 444      | +      | 6             | TCTTAC   | part of a light responsive element |

+ Unnamed\_1  
+ Unnamed\_11  
+ Unnamed\_3  
+ Unnamed\_4  
+ W box  
+ box S  
+ circadian

| Site Name | Organism                | Position | Strand | Matrix score. | sequence   | function                                                    |
|-----------|-------------------------|----------|--------|---------------|------------|-------------------------------------------------------------|
| circadian | Lycopersicon esculentum | 62       | +      | 6             | CAANNNNATC | cis-acting regulatory element involved in circadian control |
| circadian | Lycopersicon esculentum | 407      | +      | 6             | CAANNNNATC | cis-acting regulatory element involved in circadian control |
| circadian | Lycopersicon esculentum | 179      | +      | 6             | CAANNNNATC | cis-acting regulatory element involved in circadian control |

Figure S5

B-type (upstream of *PpDAM2=ProDAM2*):

SD/-Leu

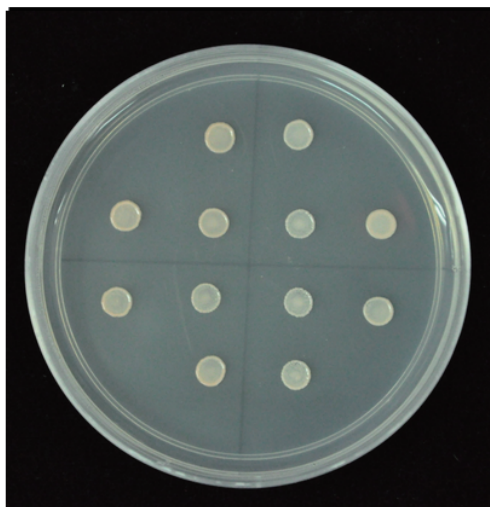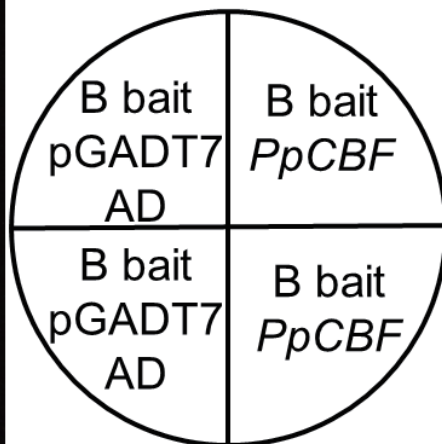

SD/-Leu  
150  $\mu$ M AbA

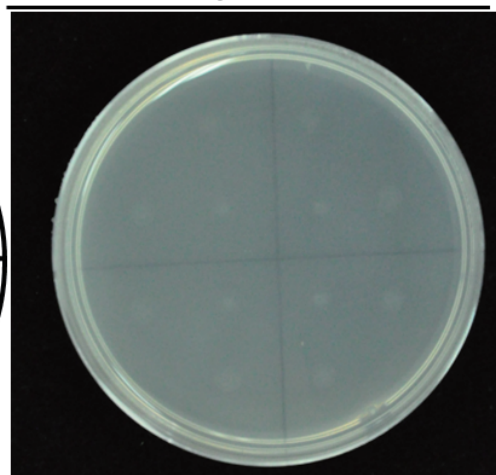

Figure S6
